# Supplementary material
Source: Frontiers journal article supplement (https://www.frontiersin.org/articles/500828)
Supplement: Data_Sheet_1.docx [file Data_Sheet_1.docx]

Supplementary Material

## Supplementary Figure


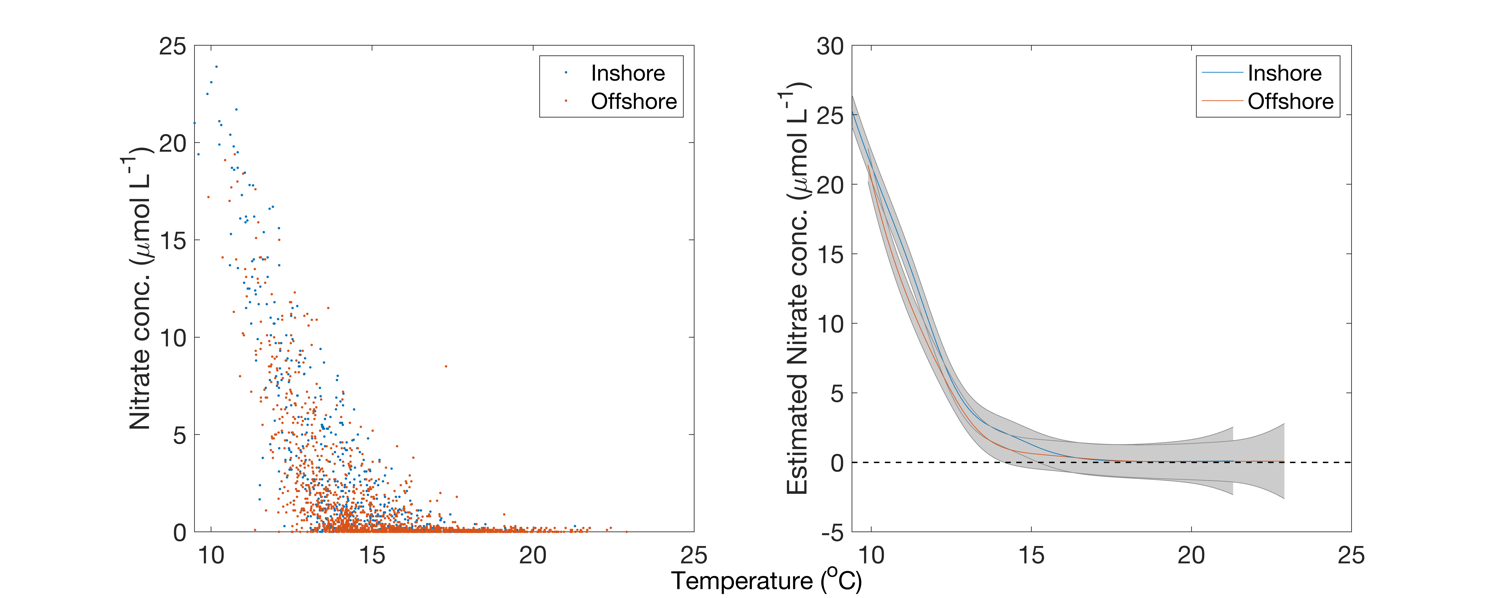


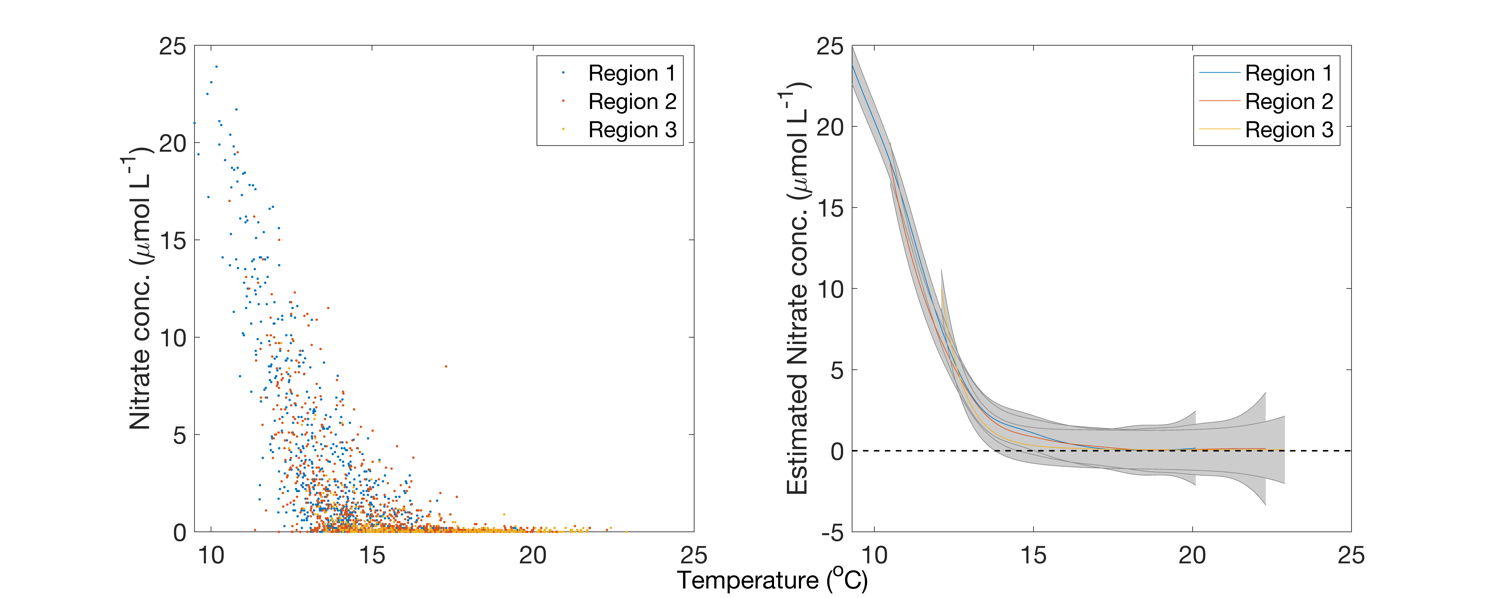


Supplementary Figure . Left column: Temperature and nitrate measurements separated by inshore/offshore in the Southern California Bight (top) and northern, central, and southern regions in the Santa Barbara Channel (bottom). Right column: Generalized Additive Model for temperature to nitrate relationships. Grey bars are the standard error.
