# Supplementary material
Source: Frontiers journal article supplement (https://www.frontiersin.org/articles/500828)
Supplement: Data_Sheet_4.docx [file Data_Sheet_4.docx]

Supplementary Material

Supplementary Figure 4. a. 100 meter resolution maps of SST and estimated nitrate concentration in the Santa Barbara Channel derived from Landsat 8 imagery. b. normal curve fit of error distribution of nitrate concentration at different spatial resolutions. c. Linear fit lines between nitrate concentration calculated from different resolution SST. d. Maps of error between different nitrate products.
